# Supplementary material for: Energetics of burrowing by the cirratulid polychaeteCirriformia moorei
Source: Oxford University Press journal article supplement (doi:10.1242/jeb.054700), 2011-06-08
Supplement: jeb054700tables1.pdf [file jeb054700tables1.pdf]

Table S1. Oxygen consumption rates for individual worms

| Worm weight<br>(g) | Time<br>burrowed<br>(min) | Distance<br>burrowed<br>(cm) | Resting oxygen consumption ( $\mu\text{g O}_2 \text{g}^{-1} \text{h}^{-1}$ ) |            |           | Burrowing oxygen consumption ( $\mu\text{g O}_2 \text{g}^{-1} \text{h}^{-1}$ ) |            |           |
|--------------------|---------------------------|------------------------------|------------------------------------------------------------------------------|------------|-----------|--------------------------------------------------------------------------------|------------|-----------|
|                    |                           |                              | From                                                                         |            |           | From                                                                           |            |           |
|                    |                           |                              | From water                                                                   | hemoglobin | Total     | From water                                                                     | hemoglobin | Total     |
| 0.75               |                           |                              | 4.6                                                                          | 5.5        | 10.1      |                                                                                |            |           |
| 0.415              |                           |                              | 10.6                                                                         | 9.8        | 20.4      |                                                                                |            |           |
| 0.37               |                           |                              | 17.5                                                                         | 4.3        | 21.8      |                                                                                |            |           |
| 0.524              |                           |                              | 9.3                                                                          | 2.2        | 11.5      |                                                                                |            |           |
| 0.483              |                           |                              | 8.1                                                                          | 10.4       | 18.5      |                                                                                |            |           |
| 0.238              |                           |                              | 16.5                                                                         | 11.4       | 27.9      |                                                                                |            |           |
| 0.41               | 93                        | 12.5                         | 22.9                                                                         | 7.5        | 30.4      | 1.7                                                                            | 1.0        | 2.7       |
| 0.25               | 32                        | 6.0                          | 50.2                                                                         | 40.0       | 90.2      | 16.5                                                                           | 13.1       | 29.6      |
| 0.388              | 27                        | 6.2                          | 12.0                                                                         | 0          | 12.0      | 6.0                                                                            | 3.3        | 9.3       |
| 0.191              | 37                        | 5.6                          | 26.9                                                                         | 15.0       | 41.9      | 4.5                                                                            | 2.4        | 6.9       |
| 0.167              | 37                        | 5.5                          | 18.9                                                                         | 5.0        | 23.9      | 9.9                                                                            | 0          | 9.9       |
| 0.276              | 30                        | 4.5                          | 52.8                                                                         | 22.5       | 75.3      | 37.3                                                                           | 14.0       | 51.3      |
| 0.562              | 7                         | 1.0                          | 18.9                                                                         | 10.9       | 29.8      | 12.4                                                                           | 8.6        | 21.0      |
| 0.174              | 50                        | 6.5                          | 53.5                                                                         | 12.0       | 65.5      | 37.3                                                                           | 2.4        | 39.7      |
| 0.353              | 65                        | 9.5                          | 50.8                                                                         | 0          | 50.8      | 56.8                                                                           | 5.5        | 62.3      |
| 0.428              | 25                        | 5.2                          | 5.5                                                                          | 11.7       | 17.2      | 8.0                                                                            | 2.4        | 10.4      |
| 0.231*             | 11                        | 2.5                          | 12.4                                                                         | 10.0       | 22.4      | 39.6                                                                           | 24.5       | 64.1      |
| 0.265              | 70                        | 6.0                          | 42.0                                                                         | 16.7       | 58.7      | 19.3                                                                           | 5.1        | 24.4      |
| 0.599              | 30                        | 6.0                          |                                                                              | N/A        |           | 35.5                                                                           | 18.0       | 53.5      |
| 0.15               | 21                        | 5.5                          |                                                                              | N/A        |           | 18.1                                                                           | 11.4       | 29.5      |
| 0.361±0.163        | 38.2±23.8                 | 5.9±2.7                      | 24.1±17.5                                                                    | 10.8±9.3   | 34.9±23.7 | 21.6±16.7                                                                      | 8.0±7.3    | 29.6±21.3 |

\*Outlier.
